# Supplementary material
Source: Springer Nature journal article supplement (https://www.springermedizin.de/resource/supplementary/13012_2008_138_MOESM7_ESM.pdf/9629442)

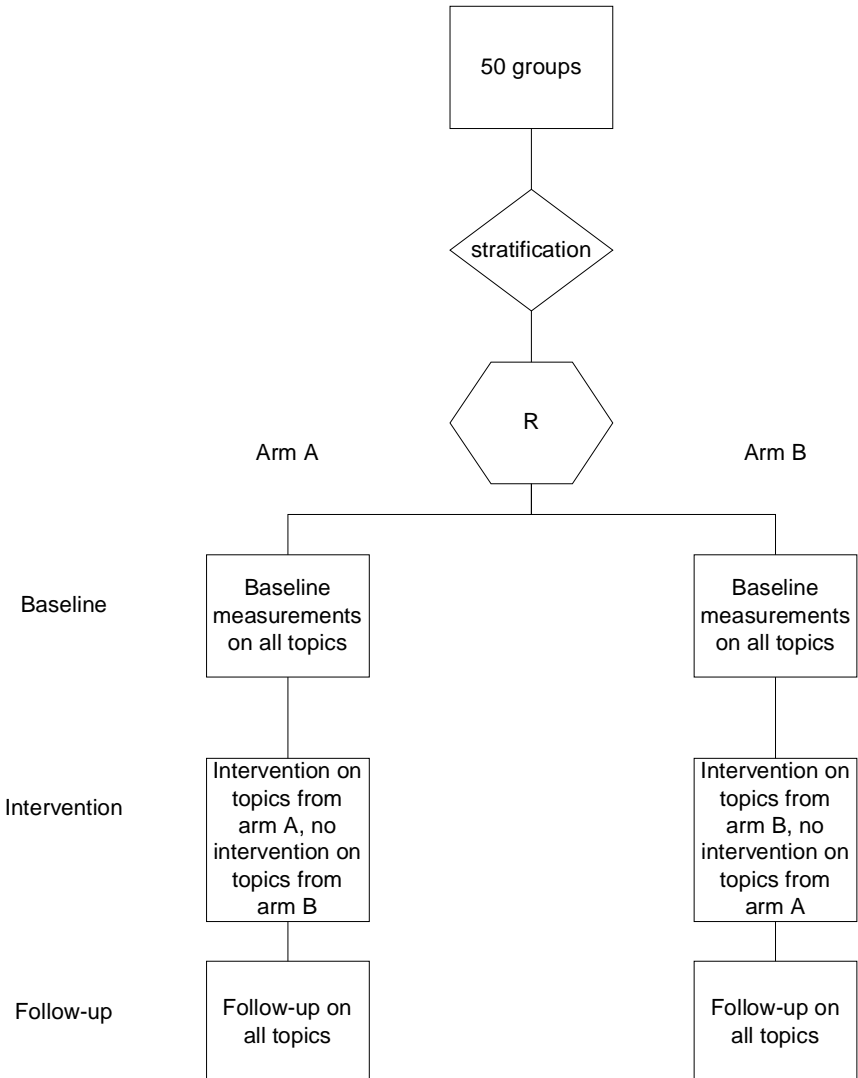

Supplement: MOESM7 [file 9629442]
